# Supplementary material for: Numerical Model of Streaming DEP for Stem Cell Sorting
Source: PubMed Central journal article supplement (PMC6190341; doi:10.3390/mi7120217), 2016-11-30
Supplement: micromachines-07-00217-s001.pdf [file micromachines-07-00217-s001.pdf]

# Supplementary Materials: Numerical Model of Streaming DEP for Stem Cell Sorting

Rucha Natu and Rodrigo Martinez-Duarte

**Table S1.** Parameters defined for the simulation.

| Name          | Value                            | Description                                  |
|---------------|----------------------------------|----------------------------------------------|
| Flow velocity | $u$                              | Flow rate in channel                         |
| $R$           | From Figure 2a in the manuscript | Radius of Stem Cell                          |
| $\sigma_m$    | 0.51500 S/m                      | Conductivity of Media                        |
| CM            | From Figure 2a in the manuscript | Clausius Mossotti Factor                     |
| $\mu$         | $8.90 \times 10^{-4}$ Pa·s       | Dynamic viscosity of water as media at 25 °C |
| $\epsilon_m$  | 80.2                             | Relative Permittivity of water as media      |

**Table S2.** Equations defined for the simulation. “ec” represents the equations used in Electric Currents interface in COMSOL.

| Name      | Expression                                               | Unit                             | Description                                                              |
|-----------|----------------------------------------------------------|----------------------------------|--------------------------------------------------------------------------|
| GradEx    | $d(ec.E_y^2 + ec.E_x^2 + ec.E_z^2, x)$                   | $m \cdot kg^2 / (s^6 \cdot A^2)$ | Gradient in $x$ direction                                                |
| GradEy    | $d(ec.E_y^2 + ec.E_x^2 + ec.E_z^2, y)$                   | $m \cdot kg^2 / (s^6 \cdot A^2)$ | Gradient in $y$ direction                                                |
| GradEz    | $d(ec.E_y^2 + ec.E_x^2 + ec.E_z^2, z)$                   | $m \cdot kg^2 / (s^6 \cdot A^2)$ | Gradient in $z$ direction                                                |
| GradTotal | $\sqrt{\sum ((d(ec.E_y^2 + ec.E_x^2 + ec.E_z^2, x))^2)}$ | $m \cdot kg^2 / (s^6 \cdot A^2)$ | Total Gradient                                                           |
| FDragx    | $6\pi R\mu \times u$                                     | $m \cdot kg / s^2$               | Drag force in $x$ direction (similar equations in $y$ and $z$ direction) |
| FDEPx     | $2\pi R^3 \times \epsilon_m \times CM \times GradEx$     | $m \cdot kg / s^2$               | DEP Force in $x$ direction (similar equations in $y$ and $z$ direction)  |
